# Supplementary material
Source: publisher figshare collection journal article supplement (https://gsajournals.figshare.com/ndownloader/files/12808262)
Supplement: Supplementary file 1 [file 12808262]

**Result S1. List of genes with similar expression changes shared by *wdr-23(mac35lf)* and *skn-1(mac53gf)* mutants with or without excess iodide.**

(*P* < 0.05 for each expression).

| **Gene name** | ***mac35* vs *WT*** | ***mac35*-I vs *WT*-I** | ***mac53* vs *WT*** | ***mac53*-I vs *WT*-I** |
| --- | --- | --- | --- | --- |
| **Log2FC** | **Log2FC** | **Log2FC** | **Log2FC** |
| *asp-14* | 3.744795546 | 3.041048523 | 3.030384287 | 2.337847948 |
| *B0462.4* | 7.957508918 | 7.044396412 | 6.059346171 | 5.252439467 |
| *C08E8.10* | 5.472220586 | 5.144812767 | 4.200903969 | 3.830198135 |
| *C13B4.1* | 3.507605477 | 2.893099721 | 2.371227303 | 1.913435842 |
| *C18H9.6* | 2.426143916 | 1.862393952 | 2.360093652 | 1.884882078 |
| *C32H11.4* | 5.637367965 | 5.102622228 | 4.3656018 | 3.901060524 |
| *C35B1.5* | 3.398962709 | 3.476145915 | 2.152322388 | 2.059341125 |
| *C55A6.4* | 3.503474065 | 4.144985713 | 2.576740437 | 3.006412971 |
| *clec-3* | 8.329791078 | 7.210050795 | 6.889363854 | 5.839646798 |
| *clec-66* | 3.328265444 | 2.337246018 | 2.489263203 | 1.605615887 |
| *clec-73* | 8.508150604 | 8.058681783 | 7.064126475 | 6.78360869 |
| *clec-74* | 7.700514885 | 7.424892885 | 5.95872442 | 5.820613931 |
| *clec-143* | 5.196150897 | 5.10038048 | 3.955518648 | 3.875593284 |
| *clec-265* | 3.998951722 | 2.467673242 | 3.618540185 | 2.20263749 |
| *col-78* | 3.985004718 | 4.788672436 | 3.09589258 | 3.927211003 |
| *ctl-3* | 4.671509871 | 4.564247941 | 3.411645183 | 3.367066194 |
| *dhs-12* | 2.83856088 | 3.126874351 | 2.030528867 | 2.12726937 |
| *dod-17* | 5.49726014 | 5.209171492 | 3.75565982 | 3.425891216 |
| *dod-24* | 5.180554775 | 4.738636343 | 4.032904577 | 3.566261385 |
| *E03A3.1* | 5.150686966 | 4.703590009 | 3.626808202 | 3.103125125 |
| *F01D5.3* | 3.903647217 | 4.538778341 | 2.86245733 | 3.128708501 |
| *F39B2.3* | 2.612776965 | 2.368401433 | 2.022878495 | 1.764687627 |
| *F55G1.9* | 4.073556412 | 4.035327999 | 2.475223911 | 2.317995259 |
| *F55G11.2* | 7.035157686 | 5.949315956 | 5.537533047 | 4.353708475 |
| *F55G11.3* | 4.469777979 | 3.76775949 | 4.925207804 | 3.716590377 |
| *F55G11.8* | 4.370710582 | 4.220566984 | 2.819717548 | 2.472658406 |
| *F56D5.3* | 5.214884568 | 4.70895299 | 4.49112778 | 4.025981423 |
| *F57C9.1* | 4.014443702 | 3.709120096 | 2.938388446 | 2.482361491 |
| *gcs-1* | 3.537712834 | 3.274500039 | 2.783730836 | 2.457638269 |
| *gst-1* | 3.575297694 | 3.641725308 | 2.332534232 | 2.384004764 |
| *gst-2* | 3.254870636 | 2.970033075 | 2.899108954 | 2.550424 |
| *gst-4* | 6.082374499 | 5.959100079 | 4.819524847 | 4.408919785 |
| *gst-7* | 3.766979359 | 3.790141093 | 2.790946334 | 2.670075453 |
| *gst-12* | 5.376001243 | 5.264099722 | 4.228294459 | 4.009950069 |
| *gst-14* | 4.758451781 | 4.696242957 | 3.664738394 | 3.521775119 |
| *gst-16* | 5.324077431 | 4.663144396 | 4.663362134 | 3.916673798 |
| *gst-20* | 2.690708346 | 2.709165889 | 2.045654294 | 1.925909807 |
| *gst-25* | 8.420894337 | 6.505294964 | 6.698636573 | 4.851393912 |
| *gst-30* | 9.564027276 | 8.885252575 | 7.30340205 | 6.540482228 |
| *gst-31* | 3.593450217 | 3.740638251 | 2.699649776 | 2.607232699 |
| *gst-34* | 4.650930156 | 3.66321733 | 4.45715073 | 3.603746599 |
| *gst-37* | 6.48615706 | 6.244314892 | 4.81039062 | 4.493791996 |
| *gst-38* | 6.788615048 | 6.562581495 | 4.69182289 | 4.162485914 |
| *gst-39* | 3.466412217 | 3.255980799 | 2.619462714 | 2.325693057 |
| *gst-40* | 6.294517759 | 6.519454357 | 2.576497813 | 2.634124735 |
| *H20E11.3* | 4.209486365 | 4.273196323 | 3.166283358 | 3.021892307 |
| *mrp-7* | 3.197234398 | 2.828451707 | 2.756400536 | 2.160633503 |
| *nit-1* | 4.050911894 | 3.860547834 | 3.462257873 | 3.291340086 |
| *R05D8.7* | 4.015182285 | 3.751078541 | 3.030709345 | 2.823095222 |
| *sdz-8* | 4.081200967 | 4.327479579 | 2.821346627 | 2.956910509 |
| *sodh-2* | 4.198266591 | 4.525984787 | 3.133996137 | 3.507685954 |
| *spe-26* | 2.757293458 | 2.605066437 | 2.963789806 | 2.745680997 |
| *swt-2* | 4.830627312 | 6.369653881 | 3.397349626 | 4.477097098 |
| *T05F1.9* | 3.152582704 | 3.302210848 | 2.737641199 | 2.684722309 |
| *T19D12.3* | 4.995871271 | 4.984942675 | 3.367406413 | 3.377096539 |
| *ugt-10* | 4.907791697 | 4.690846207 | 4.026205671 | 3.680670168 |
| *ugt-11* | 3.570764538 | 3.121129094 | 2.29868348 | 1.739427337 |
| *ugt-13* | 3.947962028 | 3.463797438 | 3.240379818 | 2.962928333 |
| *ugt-38* | 10.46259333 | 8.789111106 | 6.986982229 | 5.467048044 |
| *W06H8.2* | 7.392708081 | 6.347975336 | 5.99989853 | 5.129379389 |
| *wdr-23* | 3.744215153 | 3.365981598 | 3.254034306 | 2.936930941 |
| *Y19D10A.4* | — | — | — | — |
| *Y42G9A.3* | 2.429206942 | 2.451604589 | 2.078776319 | 2.280263795 |
| *Y52E8A.3* | 5.954639372 | 5.993166257 | 4.169949539 | 4.007333383 |
| *ZK742.4* | 4.441232003 | 3.874668637 | 3.742171545 | 2.983176023 |
|  |  |  |  |  |
| *clec-82* | -4.682497493 | -4.394638762 | -2.969635151 | -2.650096031 |
| *F46C5.1* | -5.098524329 | -3.485810189 | -4.458411087 | -3.45103789 |
| *lys-10* | -6.331578158 | -6.926556851 | -5.399721056 | -5.165661624 |
| *sqst-4* | -8.630814828 | — | -8.622234349 | -5.670182354 |
| *T22F3.11* | -5.010933321 | -3.583167163 | -4.444777169 | -2.659754067 |
| *ugt-53* | -2.578460979 | -2.652872853 | -2.423468661 | -2.087402517 |

“—“: For *Y19D10A.4*, no expression was detected in wild type. For *sqst-4*, no expression was detected in *wdr-23(mac35lf)* treated with excess iodide.
